# Supplementary material for: Prognostic significance of L1 cell adhesion molecule in cancer patients: A systematic review and meta-analysis
Source: PubMed Central journal article supplement (PMC5356729; doi:10.18632/oncotarget.13236), 2016-11-09
Supplement: oncotarget-07-85196-s001.pdf [file oncotarget-07-85196-s001.pdf]

# Prognostic significance of L1 cell adhesion molecule in cancer patients: A systematic review and meta-analysis

## SUPPLEMENTARY FIGURE AND TABLES

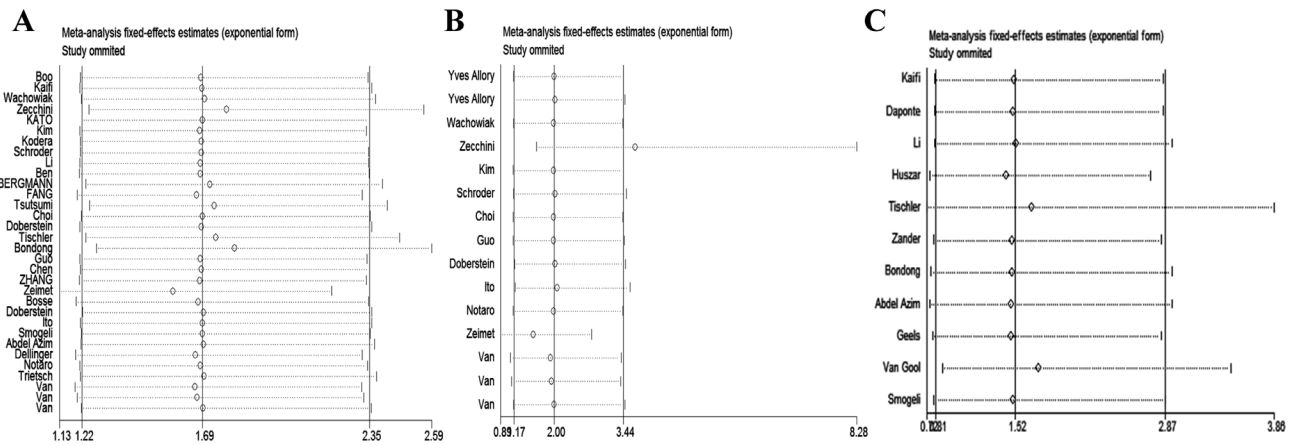

**Supplementary Figure S1: Sensitivity analysis of L1CAM expression in the prognosis of patients with solid tumours.**  
**A.** Overall survival **B.** Disease-free survival **C.** PFS/RFS. Abbreviations: PFS, progression-free survival; RFS, recurrence-free survival.

**Supplementary Table S1: Subgroup meta-analysis exploring proper IHC cut-off value for patient with different outcome endpoints**

| Cut-off         | OS                 |       | DFS               |       | PFS/RFS            |       |
|-----------------|--------------------|-------|-------------------|-------|--------------------|-------|
|                 | HR(95% CI)         | P     | HR(95% CI)        | P     | HR(95% CI)         | P     |
| >5%             | 1.902(1.398-2.587) | 0.000 |                   |       |                    |       |
| >10%            | 2.221(1.201-4.109) | 0.001 | 2.798(1.16-6.784) | 0.022 | 1.862(0.757-4.576) | 0.176 |
| scores $\geq$ 1 | 1.464(1.17-1.832)  | 0.011 |                   |       | 3.651(0.822-16.21) | 0.089 |

Quantitative analysis were performed when one cut-off value was adopted in more than 3 studies

Supplementary Table S2: Newcastle-Ottawa Scale to assess the quality of the included studies

| study           | Selection               |                       |                           | Outcomes present at start of study | Comparability                        | Outcome               |                                          |                                       | Total scores |
|-----------------|-------------------------|-----------------------|---------------------------|------------------------------------|--------------------------------------|-----------------------|------------------------------------------|---------------------------------------|--------------|
|                 | Representative of cases | Selection of controls | Ascertainment of exposure |                                    | Comparability the design or analysis | Assessment of outcome | Adequate follow-up time ( $\geq 1$ year) | Adequacy of follow up ( $\geq 80\%$ ) |              |
| Allory 2005     | 1                       | 1                     | 1                         | 1                                  | 2                                    | 0                     | 1                                        | 0                                     | 7            |
| Kaifi 2006      | 1                       | 1                     | 1                         | 0                                  | 2                                    | 1                     | 1                                        | 1                                     | 8            |
| Boo 2007        | 1                       | 1                     | 1                         | 1                                  | 2                                    | 0                     | 1                                        | 1                                     | 8            |
| Kaifi 2007      | 1                       | 1                     | 1                         | 0                                  | 2                                    | 1                     | 1                                        | 0                                     | 7            |
| Wachowiak 2007  | 1                       | 1                     | 1                         | 0                                  | 2                                    | 1                     | 1                                        | 0                                     | 7            |
| Daponte 2008    | 1                       | 1                     | 1                         | 0                                  | 2                                    | 0                     | 1                                        | 0                                     | 6            |
| Zecchini 2008   | 1                       | 1                     | 1                         | 1                                  | 2                                    | 1                     | 1                                        | 0                                     | 8            |
| KATO 2009       | 1                       | 1                     | 1                         | 1                                  | 2                                    | 0                     | 1                                        | 0                                     | 7            |
| Kim 2009        | 1                       | 1                     | 1                         | 1                                  | 2                                    | 0                     | 1                                        | 1                                     | 8            |
| Kodera 2009     | 1                       | 1                     | 1                         | 1                                  | 2                                    | 1                     | 1                                        | 1                                     | 9            |
| Schroder 2009   | 1                       | 1                     | 1                         | 1                                  | 2                                    | 1                     | 1                                        | 0                                     | 8            |
| Li 2009         | 1                       | 1                     | 1                         | 1                                  | 2                                    | 0                     | 1                                        | 0                                     | 7            |
| Ben 2010        | 1                       | 1                     | 1                         | 1                                  | 2                                    | 1                     | 1                                        | 0                                     | 8            |
| BERGMANN 2010   | 1                       | 1                     | 1                         | 1                                  | 2                                    | 1                     | 1                                        | 0                                     | 8            |
| FANG 2010       | 1                       | 1                     | 1                         | 0                                  | 2                                    | 1                     | 1                                        | 0                                     | 7            |
| Huszar 2010     | 1                       | 1                     | 1                         | 0                                  | 2                                    | 1                     | 0                                        | 0                                     | 6            |
| Tsutsumi 2011   | 1                       | 1                     | 1                         | 0                                  | 2                                    | 1                     | 1                                        | 1                                     | 8            |
| Choi 2011       | 1                       | 1                     | 1                         | 1                                  | 2                                    | 1                     | 1                                        | 1                                     | 9            |
| Doberstein 2011 | 1                       | 1                     | 1                         | 1                                  | 2                                    | 1                     | 1                                        | 0                                     | 8            |
| Tischler 2011   | 1                       | 1                     | 1                         | 0                                  | 2                                    | 1                     | 1                                        | 0                                     | 7            |
| Zander 2011     | 1                       | 1                     | 1                         | 0                                  | 2                                    | 1                     | 1                                        | 0                                     | 7            |
| Bondong 2012    | 1                       | 1                     | 1                         | 0                                  | 2                                    | 1                     | 1                                        | 0                                     | 7            |
| Guo 2012        | 1                       | 1                     | 1                         | 0                                  | 2                                    | 1                     | 1                                        | 0                                     | 7            |
| Chen 2013       | 1                       | 1                     | 1                         | 1                                  | 2                                    | 1                     | 1                                        | 0                                     | 8            |
| ZHANG 2013      | 1                       | 1                     | 1                         | 1                                  | 2                                    | 1                     | 1                                        | 0                                     | 8            |
| Zeimet 2013     | 1                       | 1                     | 1                         | 0                                  | 2                                    | 1                     | 1                                        | 0                                     | 7            |
| Bosse 2014      | 1                       | 1                     | 1                         | 0                                  | 2                                    | 1                     | 0                                        | 1                                     | 8            |
| Doberstein 2014 | 1                       | 1                     | 1                         | 0                                  | 2                                    | 1                     | 1                                        | 0                                     | 8            |
| Ito 2014        | 1                       | 1                     | 1                         | 0                                  | 2                                    | 1                     | 0                                        | 0                                     | 6            |
| Van 2016        | 1                       | 1                     | 1                         | 1                                  | 2                                    | 1                     | 1                                        | 1                                     | 9            |
| Smogeli 2016    | 1                       | 1                     | 1                         | 1                                  | 2                                    | 1                     | 1                                        | 0                                     | 8            |
| Abdel 2016      | 1                       | 1                     | 1                         | 1                                  | 2                                    | 1                     | 1                                        | 0                                     | 8            |
| Dellinger 2016  | 1                       | 1                     | 1                         | 0                                  | 2                                    | 1                     | 1                                        | 0                                     | 7            |
| Geels 2016      | 1                       | 1                     | 1                         | 0                                  | 2                                    | 1                     | 1                                        | 0                                     | 7            |
| Notaro 2016     | 1                       | 1                     | 1                         | 1                                  | 2                                    | 1                     | 1                                        | 0                                     | 8            |
| Trietsch 2016   | 1                       | 1                     | 1                         | 0                                  | 2                                    | 1                     | 1                                        | 0                                     | 7            |
| Van 2016        | 1                       | 1                     | 1                         | 0                                  | 2                                    | 1                     | 1                                        | 0                                     | 7            |

**Supplementary Table S3: Literature search strategy to identify papers for the meta-analysis that describe an association between tumor L1CAM expression and prognosis**

| <b>Keywords</b>                      | <b>Search algorithm</b>                                                                                                                                                                                                                                                                                                                                                                                                                                                                                                                                                                                                                                                                                                                                                              | <b>Results</b> |
|--------------------------------------|--------------------------------------------------------------------------------------------------------------------------------------------------------------------------------------------------------------------------------------------------------------------------------------------------------------------------------------------------------------------------------------------------------------------------------------------------------------------------------------------------------------------------------------------------------------------------------------------------------------------------------------------------------------------------------------------------------------------------------------------------------------------------------------|----------------|
| <b>Tumor</b>                         | “Neoplasms”[Mesh] OR Neoplasm[Title/Abstract] OR Tumors[Title/Abstract] OR Tumor[Title/Abstract] OR Neoplasia[Title/Abstract] OR Cancer[Title/Abstract] OR Cancers[Title/Abstract] OR Benign Neoplasms[Title/Abstract] OR Neoplasms, Benign[Title/Abstract] OR Benign Neoplasm[Title/Abstract] OR Neoplasm, Benign[Title/Abstract]                                                                                                                                                                                                                                                                                                                                                                                                                                                   | 3393678        |
| <b>L1CAM</b>                         | “Neural Cell Adhesion Molecule L1”[Mesh] OR NILE Glycoprotein[Title/Abstract] OR Glycoprotein, NILE[Title/Abstract] OR Nerve Growth Factor-Inducible Large External Glycoprotein[Title/Abstract] OR Nerve Growth Factor Inducible Large External Glycoprotein[Title/Abstract] OR CALL Protein[Title/Abstract] OR CamL1 Gene Product[Title/Abstract] OR Neural Adhesion Molecule L1[Title/Abstract] OR L1 Cell Adhesion Molecule[Title/Abstract] OR L1CAM[Title/Abstract] OR NILE Protein[Title/Abstract] OR Cell Adhesion Molecule L1[Title/Abstract] OR Cell Surface Glycoprotein L1[Title/Abstract] OR NGF-Inducible Glycoprotein[Title/Abstract] OR Glycoprotein, NGF-Inducible[Title/Abstract] OR NGF Inducible Glycoprotein[Title/Abstract] OR F11 Glycoprotein[Title/Abstract] | 2021           |
| <b>Prognosis</b>                     | Prognosis OR outcome OR survival                                                                                                                                                                                                                                                                                                                                                                                                                                                                                                                                                                                                                                                                                                                                                     | 3025068        |
| <b>Tumor AND L1CAM AND Prognosis</b> |                                                                                                                                                                                                                                                                                                                                                                                                                                                                                                                                                                                                                                                                                                                                                                                      | 157            |
